# Supplementary material for: A Bacterial Homolog of a Eukaryotic Inositol Phosphate Signaling Enzyme Mediates Cross-kingdom Dialog in the Mammalian Gut
Source: PubMed Central journal article supplement (PMC3969271; doi:10.1016/j.celrep.2014.01.021), 2014-02-13
Supplement: mmc1.pdf [file mmc1.pdf]

## **Supplemental Information**

### **Supplemental Experimental Procedures**

Bacterial growth conditions

Purification of recombinant BtMinpp

BtMinpp enzymatic properties

HPLC

Inositol phosphates

InsP<sub>6</sub> assays

InsP<sub>4</sub> assay

Crystal structure determination

Molecular docking calculations

Site directed mutagenesis

Comparison of the structure of BtMinpp with other Branch 2 Histidine Phosphatases

Construction of *minpp* deletion mutant

Complementation of the *minpp* deletion mutant

Periplasmic protein extraction

Glucose-6-phosphate dehydrogenase assay

Outer membrane vesicles protein extraction

InsP<sub>6</sub> phosphatase activity measurement

Measurement of Minpp activity in the extracellular medium

Measurement of the catalytic activity of BtMinpp in resuspended OMVs

References

### **Supplemental Figure Legends**

Figure S1, Related to Figure 1. The products of BtMinpp activity against InsP<sub>6</sub> are distinct from the products of attack of fungal phytase.

Figure S2, Related to Figure 1. The products of hydrolysis of Ins(1,3,4,5)P<sub>4</sub> and InsP<sub>6</sub>

Figure S3, Related to Figure 1. Relative InsP<sub>6</sub> phosphatase activity (%) of recombinant BtMinpp at different pH values.

Figure S4, Related to Figure 2 Active site electron density for the complex of BtMinpp with inorganic phosphate.

Figure S5, Related to Figure 2. An alignment of the sequences of BtMinpp and selected MINPPs.

### **Supplemental Tables**

Table S1, Related to Figure 1. Alignment of BT\_4744 protein sequence with known MINPPs and phytases

Table S2, Related to Figure 1. Molecular and enzymatic properties of BtMinpp

Table S3, Related to Figure 2. Statistics from the comparison of BtMinpp with the structures of selected branch 2 histidine phosphatases

Table S4, Related to Figure 2.. Predicted low energy binding modes resulting from *in silico* docking of InsP<sub>6</sub> to enzyme structures

Table S5, Related to Figure 4. Genes annotated as phytases in the microbiome of the human gastrointestinal tract

Table S6, Related to Figure 4. Source organisms of MINPP proteins

Table S7, Related to Experimental Procedures. *E. coli* and *Bacteroides* strains used in the study

## **Materials and methods**

### **Bacterial growth conditions**

*E. coli* was grown at 37°C in Luria-Bertani medium (Sambrook & Russel, 2001) supplemented with 100 µg/mL ampicillin and/or 34 µg/mL chloramphenicol, 50 µg/mL kanamycin or 100 µg/mL spectinomycin. *Bacteroides* species were grown under anaerobic conditions at 37°C in BHI medium (Oxoid) supplemented with 0.001% haemin (BHIH). Antibiotic-resistance markers in *Bacteroides thetaiotaomicron* were selected using tetracycline 1 µg/mL, erythromycin 5 µg/mL or gentamicin 200 µg/mL. *E. coli* electrocompetent cells were prepared and transformed by the method of Sambrook and Russel (Sambrook & Russel, 2001).

### **Purification of recombinant and selenomethionine-labeled BtMinpp**

The 405 amino acids product of the BtMinpp C-terminal region excluding the 20 amino acid N-terminal predicted signal peptide was purified using the His-Tag technique. A PCR fragment was generated using the primer pair MINPPam (CATGCATATGCAAATAAGATACAGAAGTA) and MINPPav (CATGGGATCCCTATTCATTGAAAAGTGA) and the resulting fragment was cloned into the *NdeI/BamHI* restriction sites of the pET-15b expression vector (Novagen), which carries an N-terminal His-Tag sequence. The resulting plasmid pGH07 was used to transform BL21-CodonPlus(DE3)-RIL *E. coli* cells (Stratagene) and B834 (DE3) (Novagen) transformed with the pACYC-based tRNA-encoding plasmid RIL (Stratagene). The Ni-NTA Fast Start kit (Qiagen) was used to purify the protein according to the instruction of the manufacturer. Cells were grown at 30°C during 16 hours with a concentration of 0.5 mM IPTG. The imidazole used to elute the protein was removed using a PD-10 desalting column (Amersham Biosciences) and the buffer exchanged with 50 mM Tris-HCl, 300 mM NaCl pH7.2. The protein concentration was determined by direct UV measurement at 280 nm and by using the Bradford method. For the production of selenomethionine-labelled His-tagged BtMinpp, the plasmid pGH07 was transformed into the *E. coli* protease-deficient B834(DE3) strain (Novagen) containing the pACYC-based tRNA-encoding plasmid RIL (Stratagene)

using double selection with ampicillin (100 µg/mL) and chloramphenicol (34 µg/mL). The resulting strain was grown overnight in LB medium and 20mL of culture was used to inoculate 1 liter of Medium Base and Nutrient Mix (Athena Enzyme Systems) supplemented with 40 µg/mL L-selenomethionine solution (Athena Enzyme Systems). The cells were grown to an OD of 0.5 before induction with 0.5 mM IPTG. Cells were harvested after 16 h induction and recombinant selenomethionine-labelled proteins were extracted and purified using the Ni-NTA Fast Start kit (Qiagen) as described above.

### **BtMinpp enzymatic properties**

*Standard assay.* InsP<sub>6</sub> phosphatase activity was measured using the PiColorLock Gold Phosphate Detection System (Innova Biosciences) based on the change in absorbance of the dye malachite green in the presence of phosphomolybdate complexes. 10 µM InsP<sub>6</sub> (Merck) was mixed with purified BtMinpp or protein extracts pre-treated with PiBind™ resin (Innova Biosciences) that removes contaminating Pi from buffers.

*pH optimum and pH stability.* The assay was performed using a variety of buffers: pH 1.0–3.5, 0.2 M glycine–HCl; pH 4.0–6.0, 0.05 M sodium acetate; pH 6.5–9.5, 0.2 M Tris–HCl. To determine the optimal pH, 2 ng of BtMinpp was incubated for 5 minutes at 37°C at different pH in the presence of 100µM InsP<sub>6</sub> and Pi release was measured under the standard InsP<sub>6</sub> dephosphorylation assay conditions. pH stability was determined after dilution and incubation of 10 ng of enzyme in different buffers and storage at 4°C for 24 hours.

*Effect of temperature on enzyme activity.* The temperature profile of the purified enzyme was determined in the temperature range from 10 C° to 80 C° using the standard assay. To check thermal stability, the purified enzyme was incubated at different temperatures for 10 minutes, cooled to 4 C°, and assayed using the standard InsP<sub>6</sub> dephosphorylation assay.

*Effect of pepsin on enzyme activity.* Enzyme inactivation by pepsin was determined by incubating 20 mU of BtMinpp in 0.2 M glycine–HCl pH 2.5, containing 3000 U pepsin for 30 min at 37 C°. After incubation, InsP<sub>6</sub> phosphatase activity was determined using the standard InsP<sub>6</sub> dephosphorylation assay.

## HPLC

Inositol phosphate products of assays using  $^{32}\text{P}$ -labelled substrate were resolved by HPLC on a 23.5 cm x 4.6 mm i.d. WVS Partisphere SAX column (Whatman, UK, Ltd) fitted with a SAX guard cartridge (Whatman). The column was eluted at 1 mL/min with a gradient formed by mixing solvents from buffer reservoirs containing: water (A) and 1.25M-( $\text{NH}_4$ ) $_2$ HPO $_4$ , adjusted to pH 3.8 with H $_3$ PO $_4$  (B). Solvents were mixed according to the following gradient: time (min), %B; 0,0; 5,0; 65,100; 75,100. Additional separations were performed on a 25 cm x 4.6 mm Alltech Adsorbosphere SAX column (Grace Davison Discovery Sciences, Deerfield, IL, USA) fitted with a Alltech guard cartridge. The column was eluted at 1 mL/min with a gradient formed by mixing solvents from buffer reservoirs containing: water (A) and 1.25M-( $\text{NH}_4$ ) $_2$ HPO $_4$ , adjusted to pH 3.8 with H $_3$ PO $_4$  (B). Solvents were mixed according to the following gradient: time (min), %B; 0,0; 5,0; 65,25; 67,0.

Radioactivity was estimated by Cerenkov counting with a Canberra Packard (Pangbourne, Berks, UK) A500 series Radiomatic Flo Detector fitted with a 0.5 mL flow cell. The integration interval for counting was 12 s. Data was exported from the FloOne for Windows software (Canberra Packard) as an ASCII file and redrawn in Delta Graph v.4.0 (DeltaPoint, Monterey, CA). In some experiments fractions (0.2 or 0.3 min) were collected and radioactivity estimated by Cerenkov counting in a scintillation counter. Subsequently, 1mL water and 4mL Optima Flo-AP (Canberra Packard) scintillation fluid were added and the fractions were counted for  $^3\text{H}$  or  $^{14}\text{C}$  by scintillation counting in either a Wallac (Turku, Finland) 1409 or LabLogic (Sheffield, UK) 300SL scintillation counter.

## Inositol phosphates

*Myo*-inositol(1,[ $^{32}\text{P}$ ]2,3,4,5,6)P $_6$  was prepared using recombinant AtIPK1 according to Nagy et al. (Nagy et al, 2009). *Myo*-[2- $^3\text{H}$ ]inositol-1 and *myo*-[ $^{14}\text{C}$ ]inositol-labelled InsP $_5$  standards were prepared by acid treatment of the respective Ins(1,3,4,5,6)P $_5$  according to Brearley and Hanke (Brearley & Hanke, 1996).

### **Assays with Ins(1,[<sup>32</sup>P]2,3,4,5,6)P<sub>6</sub> substrate**

BtMinpp was assayed at 37 °C by the addition of 10 µL of 0.44 mg/mL protein in 20 mM glycine-HCl, pH 2.5, to 1 mL of 10 mM sodium salt of InsP<sub>6</sub> (Sigma) containing approximately 74 kBq Ins(1,[<sup>32</sup>P]2,3,4,5,6)P<sub>6</sub>. Aliquots of the assay were removed at intervals and subjected to chromatography. The data shown in Figure S3C was obtained after 60 min. Human MINPP1 was assayed at a protein concentration of 0.1 mg/mL in 25 mM Tris, 150 mM NaCl, 2mM MgCl<sub>2</sub>, pH 7.2, with approximately 3.7 kBq of Ins(1,[<sup>32</sup>P]2, 3,4,5,6)P<sub>6</sub>. Reaction products were analyzed after 2 hours at 37 °C (Figure S3A). *Aspergillus ficuum* phytase (Sigma) was assayed at 37 °C by the addition of 10 µL of 0.44 mg/mL protein in 20 mM glycine-HCl, pH 2.5, to 1 mL of 10 mM sodium salt of InsP<sub>6</sub> (Sigma) containing approximately 7.4 kBq Ins(1,[<sup>32</sup>P]2,3,4,5,6)P<sub>6</sub>. The data shown in Figure S3B were obtained after 60 min. Assays of BtMinpp mutants were performed, beside native protein, at 37 °C by the addition of 1 µL of 1 mg/mL protein to 0.4 mL of 10 mM sodium salt of InsP<sub>6</sub> (Sigma) in 50 mM glycine-HCl, pH 3.5, containing approximately 7.4 kBq Ins(1,[<sup>32</sup>P]2,3,4,5,6)P<sub>6</sub>. The data shown in Figure 1 were obtained after 2 min. Reactions were stopped by boiling for 2 min, before addition of nucleotide standards (to monitor chromatography) and radiolabelled standards (to confirm identity of InsP<sub>5</sub> peaks).

### **Assay of BtMinpp with Ins(1,3,4,5)P<sub>4</sub> substrate**

BtMinpp (2.5 ng/mL) was incubated for 30 min at 37 °C with 10 µM [<sup>3</sup>H]Ins(1,3,4,5)P<sub>4</sub> in assay buffer containing 25 mM HEPES, 50 mM KCl. Assays were quenched and neutralized and analyzed by HPLC as described previously (Craxton et al, 1997).

### **Crystal structure determination**

Recombinant BtMinpp was purified prior to crystallization by gel filtration using a Superdex 75 16/60 column and concentrated to 1 mg/ml. Crystallization proceeded by vapour diffusion using a 1:1 mixture of BtMinpp and a precipitant containing 0.2 M ammonium acetate pH 5.0, 18 % (w/v) PEG 3350. This crystal form, of space group P2<sub>1</sub>, has a solvent content of 48 % and has 2 molecules of Minpp in the asymmetric unit. A native dataset was collected on beamline I-02 of the Diamond Light

Source (DLS) (Didcot, UK) from a single crystal at 100 K cryoprotected with 25 % (v/v) ethylene glycol. Crystals of selenomethionyl-derivitized BtMinpp were obtained by the same procedure except that the precipitant employed for crystallization contained 0.2 M imidazole-malate pH 6.0, 15 % (w/v) PEG 4000. A single crystal was used to collect a SAD (single-wavelength anomalous dispersion) dataset on beamline I-24 of the DLS at the Se K edge ( $\lambda = 0.9799 \text{ \AA}$ ) to a resolution of 2.50  $\text{\AA}$ . Datasets were processed using MOSFLM (Leslie, 1999) and SCALA (Evans, 2006) as part of the CCP4 package (Collaborative Computational Project, 1994). The structure of SeMet Minpp was determined by SAD phasing using SHELX (Sheldrick, 2008) and chain-traced with BUCCANEER (Cowtan, 2006). This interim structural model was transferred to the cell of the native protein and refined against the native protein structure factors using PHENIX (Adams et al, 2010), alternating with manual rebuilding in COOT (Emsley & Cowtan, 2004). Refinement converged to give a final model for native Minpp displaying R-work and R-free values of 16.6 % and 21.3 %, respectively (Figure S4). When analyzed for stereochemical quality using MOLPROBITY (Chen et al, 2010) the final structure has only 2 residues (Ala 220 in both molecular copies in the AU) in the disallowed region of the Ramachandran plot. Following refinement this structure was found to contain a single inorganic phosphate ion bound at the active site. To produce crystals of substrate analogue-bound enzyme, phosphate-bound crystals were soaked in mother liquor solution containing 1 mM *myo*-inositol hexakis (hydrogen sulfate) hexapotassium salt (InsS<sub>6</sub>) and 25 % (v/v) ethylene glycol. Collection of X-ray diffraction data followed on beamline I-24 of the DLS giving a dataset to a resolution of 2.42  $\text{\AA}$ . The structure of the InsS<sub>6</sub>-bound complex was solved and refined to give R-work and R-free values of 15.6 % and 21.7 %, respectively. When analyzed for stereochemical quality using MOLPROBITY (Chen et al, 2010), the InsS<sub>6</sub>-bound structure again has only residue Ala 220 in both molecular copies in the disallowed region of the Ramachandran plot. Full data collection, phasing and refinement statistics for all structures reported herein are presented in Table S3III.

### **Molecular docking calculations**

Molecular docking experiments using torsionally-flexible phytate as ligand and the crystal structures of BtMinpp and *A.niger* PhyA (Kostrewa et al, 1997) as receptors were carried out using AutoDock

Vina (Trott & Olson, 2010). A D-2 axial model for InsP<sub>6</sub> (D-2 axial and five equatorial phosphates) was used as representative of the predominant conformation at the acidic pH used in our hydrolysis assays (Isbrandt & Oertel, 1980). Atomic coordinates for the ligand obtained from the Hic-Up database (Kleywegt et al, 2003). The structures of ligand and receptor were formatted with AutoDockTools 1.5.4 (Morris et al, 2009). The chemical bonds involving the phosphate groups of InsP<sub>6</sub> were defined as rotatable giving a total of 12 degrees of torsional freedom. Fixed (i.e. inflexible) enzyme models were used. A search space of  $16 \times 16 \times 16 \text{ \AA}^3$  was used, centred on and encompassing each enzyme active site. Docking poses were visualized with PyMOL (The PyMOL Molecular Graphics System, Version 1.3, Schrödinger, LLC). Productive binding modes were assigned as those poses found with (i) binding energies within 1 kcalmol<sup>-1</sup> of the global energy minimum and (ii) a His59 imidazole Nε2 atom to phosphate phosphorous distance of 4 Å or less. These were classified according to the phosphate groups bound in the S3 and S2 specificity subsites (Table SIV).

### **Site-directed mutagenesis**

The A31Y and R183D BtMinpp protein variants were generated using the PCR-based Phusion Site-Directed Mutagenesis kit (Thermo Scientific) according to the manufacturer's instructions. The primer pairs A31Y (GAAGTATGCAGGGACGTACATGCCCTATCCTAATAG), A31Y\_antisense (TGTATCTTAGTTTGCATATGGCTGCCG) and R183D (CAATATAATCATATCCTTGATTTTTTTGATCTGAATAAATC), R183D\_antisense (TTTTCCTTCACTTCGCTGTAC) were used to obtain the A31Y and R183D amino acid substitutions, respectively, using pGH07 as a template. The resulting plasmids were used to transform Rosetta2(DE3)pLysS *E. coli* cells and protein expression and purification were carried out as described above.

### **Comparison of the structure of BtMinpp with other Branch 2 Histidine Phosphatases**

The refined crystal structure of BtMinpp was compared to a representative subset of the available branch 2 histidine phosphates of known structure (Rigden, 2008). Dali-Lite (Holm & Park, 2000) was used to perform the structural alignments. Residue identities are calculated as the percentage of



residues found to be structurally-equivalent and chemically identical in the alignment. RMSDs are based on structurally-equivalent alpha-carbon atom positions. The protein structures with the following PDB codes were included: 1. Phytase PhyA from *A.fumigatus* (AfPhyA), PDB entry 1SK8, Uniprot sequence entry O00092 (Liu et al, 2004); 2. Phytase PhyA from *A.niger* (AnPhyA), 3K4Q, P34752 (Oakley, 2010); 3. Phytase PhyB from *A.niger* (AnPhyB), 1QFX, P34755 (Kostrewa et al, 1999); 4. Phytase from *Debaryomyces castellii* (DcPhyt), 2GFI, A2TBB4 (Ragon et al, 2009); 5. Phytase AppA from *E.coli* (EcAppA), 1DKL, P07102 (Lim et al, 2000); 6. Glucose-1-phosphatase from *E.coli* (EcG1Pase), 1NT4, P19926 (Lee et al, 2003); 7. Histidine acid phosphatase from *Francisella tularensis* (FtHAP), 3IT1, Q2A612 (Singh et al, 2009); 8. Phytase from *Hafnia Alvei* (HfPhyA), 4ARO, H9TUK5 (Ariza et al, 2013); 9. Human prostatic acid phosphatase (HsPAP), 1CVI, P15309 (Jakob et al, 2000); 10. Rat prostatic acid phosphatase (RnPAP), 1RPA, P20646 (Lindqvist et al, 1993).

### **Construction of *minpp* deletion mutant**

A 755 bp chromosomal DNA fragment downstream from *minpp*, including the last 196 nucleotides within the C-terminal region, was amplified by PCR and cloned into the *SphI/SalI* sites of the pBluescript SK- vector into *E. coli* GC10 cells (Sigma). Subsequently, a 2.2-kb PCR-generated *HindIII/PstI* fragment containing the tetracycline resistance gene *tetQ* from the *Bacteroides* plasmid pBT-2 (Tancula et al, 1992) was cloned into the *HindIII/PstI* sites of the resulting plasmid, upstream from the 5'-truncated *minpp* gene. A *SalI/SacI* fragment containing the *tetQ* and 'minpp genes was cloned into the *E. coli-Bacteroides* shuttle suicide vector pFD516 (Smith et al, 1995). Finally, a 783 bp chromosomal DNA fragment upstream from *minpp*, including the first 244 nucleotides within the N-terminal region, was amplified by PCR and cloned into the *SphI/SalI* sites of the resulting pFD516-based plasmid. The new plasmid pGH051 containing the  $\Delta minpp::tetQ$  construct, was mobilized from *E. coli* GC10 into *B. thetaiotaomicron* by triparental filter mating protocols (Shoemaker et al, 1986) using *E. coli* HB101(pRK2013) as the helper strain. Transconjugants were selected on BHI-hemin agar containing gentamicin and tetracycline. Determination of sensitivity to either tetracycline or erythromycin was carried out to identify recombinants that were tetracycline resistant and

erythromycin sensitive. PCR analysis and sequencing were used to confirm the double-crossover genetic allele exchange. A transconjugant, GH59, containing the  $\Delta minpp::tetQ$  construct inserted into the *B. thetaiotaomicron* chromosome was selected for further studies.

### **Complementation of the *minpp* deletion mutant and overexpression**

To complement the *B. thetaiotaomicron minpp* deletion mutant GH59, the *Bacteroides* expression vector pFI2716 (Wegmann et al, 2013) was employed. The primer pair *Bsp*HI\_minPP1\_5' (ATTCATGAAAAGATTATTATTTGTT) and minPP1\_*Bam*HI\_3' (TAGGATCCTATTCATTGAAAAGTGA) was used to amplify a 1279 bp region encoding *minpp* from *B. thetaiotaomicron* VPI-5482 genomic DNA. The *minpp* fragment was digested with *Bsp*HI and *Bam*HI before cloning into the *Nco*I/*Bam*HI sites of the *Bacteroides* expression vector pFI2716, creating pGH035. Conversion of tetracycline resistance to clindamycin-erythromycin resistance: the primer pair *ccr*\_amont2 (CATGCATATGAGCTCCATGCTATAGCTACC) and *ccr*\_aval2 (CATGGGATCCGCCAGCCGTTATGCGGCAGC) was used to amplify a 1252 bp region encoding *ermF* from the plasmid pFD516 (Smith et al, 1995). The *ermF* fragment was digested with *Nde*I and cloned into *Nde*I digested (blunted) and *Nsi*I digested pGH035, to replace the existing 1803 bp *tetQ* portion of pGH035, creating pGH038. For overexpression purposes the *Bsp*HI and *Bam*HI digested *minpp* fragment described above was cloned into similar sites of the medium-level expression vector pGH020 (Wegmann et al, 2013) creating pGH036. This was followed by the conversion from tetracycline resistance to erythromycin resistance as described above, creating pGH037. The transformation of the *minpp* deletion mutant GH59 with pGH037 resulted in the creation GH115.

### **Periplasmic protein extraction**

*Bacteroides* species were grown in 20 mL of BHI supplemented with 0.001% hemin for 16 hours. The cells were centrifuged at 3500 g for 10 minutes and the periplasmic fraction was prepared according to the method described by Osborn *et al.* (Osborn et al, 1972). Briefly, the cell pellet was resuspended in 4 ml of fractionation buffer (Tris 30 mM, sucrose 20%, EDTA 1mM, pH8) and incubated for 10 minutes at 20°C. The cell suspension was centrifuged for 10 minutes at 3000 g and the cell pellet was

resuspended in 0.8 ml of ice-cold 5 mM MgSO<sub>4</sub> and the suspension was left on ice for 10 minutes. The osmotic shock fluid was harvested by centrifugation for 10 minutes at 3000 g, 4°C. To verify that no cross-contamination of cytoplasmic proteins occurred, glucose-6-phosphate dehydrogenase activity was assessed (described in *S1 Materials and Methods*) in the different periplasmic fractions and no activity was detected.

### **Glucose-6-phosphate dehydrogenase assay**

100 µl of periplasmic or cytoplasmic extract was added to the following solution, pre-incubated at 30°C: 2.5 mL of 50 mM glycylglycine buffer pH 7.4, 0.2 mL of 150 mM MgCl<sub>2</sub>; 0.1 mL of 20 mM NADP and 0.1 mL of 60 mM glucose-6-phosphate (Noltmann et al, 1961). The increase in A<sub>340</sub>/min for 4 to 5 minutes was recorded (UVIKON XS spectrophotometer, NorthStar Scientific) and the A<sub>340</sub>/minute from the initial linear portion of the curve was calculated.

### **Outer membrane vesicles protein extraction**

Cultures of bacteria were centrifuged at 5000 g for 15 minutes at 4°C and the supernatant filtered through a 0.22 µm PES membrane (Sartorius) to remove debris and cells. Supernatants were concentrated by molecular weight (100 kDa MWCO, Sartorius) and the retentate ultracentrifuged (150,000 g for 2 h at 4 °C in a Ti70 rotor (Beckman Instruments). The supernatant was carefully aspirated from the tubes and the vesicle pellet was resuspended with 25 mM Tris buffer (pH 7.4). The pellet was washed with the same Tris buffer and centrifuged at 16000 g for 30 min. The pellet was resuspended in Tris buffer and OMV sterility examined by checking for growth of any contaminating bacterial cells on BHIH agar. The OMVs were disrupted by sonication. The OMV protein content was determined using the Total Protein Micro protein assay reagent kit (Sigma).

### **InsP<sub>6</sub> phosphatase activity measurement**

Contaminating inorganic phosphate was removed from *Bacteroides* cytoplasmic, periplasmic and OMV fractions using PiBind™ resin (Innova Biosciences) prior to InsP<sub>6</sub> phosphatase activity measurements. The phosphatase activity was measured after diluting 10 µl of phosphate-depleted

extracts with Tris buffer (25mM, pH 7.5) in the presence of 10  $\mu$ M of InsP<sub>6</sub> (Merck) and the mixture was incubated at 37°C for 1 hour. InsP<sub>6</sub> dephosphorylation was measured using a molybdate/malachite green-based activity assay for the quantification of phosphate release (PiColorLock Gold Phosphate Detection System, Innova Biosciences) according to the manufacturer's instructions.

### **Measurement of Minpp activity in the extracellular medium**

20 mL of *Bacteroides* 16-hour cultures in BHI-hemin were centrifuged at 3500 g for 10 minutes and the supernatants were filtered through a 0.22  $\mu$ m PES membrane (Sartorius) to remove debris and cells. The supernatants were then filtered through a 1000 kDa MWCO (Sartorius) filter to remove OMVs and the filtrate was further filtrated through a 10 kDa MWCO filter (Sartorius) to concentrate the 20 mL solution containing Minpp (49 kDa) down to 200  $\mu$ l (100x). InsP<sub>6</sub> phosphatase activity was measured following depletion of inorganic phosphate with PiBind™ resin (Innova Biosciences) in 10  $\mu$ l of the concentrated solution using the malachite green activity assay.

### **Measurement of the catalytic activity of BtMinpp in resuspended OMVs**

Bacterial cells from 500 mL cultures were centrifuged at 5000 g for 20 minutes at 4°C and the supernatant filtered through a 0.22  $\mu$ m PES membrane (Sartorius) to remove debris and cells. Supernatants were concentrated by molecular weight (100 kDa MWCO) using a Vivaflow 50 ultrafiltration device (Sartorius) at 4°C. To rinse the vesicles, the 5 mL of residual retentate was diluted 100 times in Tris buffer (25mM, pH 7.5) and the resulting 500 mL concentrated to 5 mL. The vesicles were further concentrated to 2 mL with a Vivaspin 20 centrifugal concentrator (Sartorius) and filtered through a 0.22  $\mu$ m PES membrane (Sartorius). Vesicles concentrations were adjusted according to the protein concentration obtained after sonication of the suspensions using the Bradford method. To measure the activity of BtMinpp, 5  $\mu$ L of vesicle suspension (corresponding to 5  $\mu$ g of soluble protein) was added to 70  $\mu$ L of either Tris buffer (25mM, pH 7.5) or in glycine-HCl buffer (20 mM, pH 2.5) and the PiColorLock Gold Phosphate Detection System was used. For *ex vivo* InsP<sub>6</sub> degradation experiments, caecal contents from 4 C57BL/6 mice were homogenised in distilled water,

centrifuged at 10,000 g for 5 min and the pellet was washed once with distilled water. Supernatants at each washing step were collected and the volume was adjusted to a final dilution factor of 1:10 (wt:v). To remove microorganisms, the supernatants were filtered through a 0.22 µm PES membrane (Sartorius). The pH of the extracts was measured at 6.5. 10 µl of vesicle suspension was added to 90 µl of extract to which 1mM of InsP<sub>6</sub> was added. HPLC: Inositol phosphates were resolved by anion exchange chromatography on a Dionex CarboPac PA-200 column (3mm x 250mm) with guard column (3mm x 50mm) eluted at a flow rate of 0.4 ml.min<sup>-1</sup> with a gradient of methane sulfonic acid prepared from buffer reservoirs containing water (A) and 0.6M methane sulfonic acid (B) mixed in ratio: time (min), % B; 0,10; 22,60; 25,100; 38,100; 39,10; 49,10. Inositol phosphates were detected by absorbance measurement at 290nm after post-column addition at 0.2 ml. min<sup>-1</sup>, of 0.1% (w/v) ferric nitrate in 2% (w/v) perchloric acid using a 375 µl knitted reaction coil.

## References

- Adams PD, Afonine PV, Bunkoczi G, Chen VB, Davis IW, Echols N, Headd JJ, Hung LW, Kapral GJ, Grosse-Kunstleve RW, McCoy AJ, Moriarty NW, Oeffner R, Read RJ, Richardson DC, Richardson JS, Terwilliger TC, Zwart PH (2010) PHENIX: a comprehensive Python-based system for macromolecular structure solution. *Acta Crystallogr D* 66: 213-221
- Ariza A, Moroz OV, Blagova EV, Turkenburg JP, Waterman J, Roberts SM, Vind J, Sjolholm C, Lassen SF, De Maria L, Glitsoe V, Skov LK, Wilson KS (2013) Degradation of phytate by the 6-phosphatase from *Hafnia alvei*: a combined structural and solution study. *PLoS one* 8: e65062
- Brearley CA, Hanke DE (1996) Metabolic evidence for the order of addition of individual phosphate esters to the myo-inositol moiety of inositol hexakisphosphate in the duckweed *Spirodela polyrhiza* L. *Biochem J* 314: 227-233
- Caffrey JJ, Hidaka K, Matsuda M, Hirata M, Shears SB (1999) The human and rat forms of multiple inositol polyphosphate phosphatase: functional homology with a histidine acid phosphatase up-regulated during endochondral ossification. *FEBS Lett* 442: 99-104
- Chassard C, Delmas E, Lawson PA, Bernalier-Donadille A (2008) *Bacteroides xyloxydans* sp nov., a xylan-degrading bacterium isolated from human faeces. *Int J Syst Evol Microbiol* 58: 1008-1013
- Chen VB, Arendall WB, Headd JJ, Keedy DA, Immormino RM, Kapral GJ, Murray LW, Richardson JS, Richardson DC (2010) MolProbity: all-atom structure validation for macromolecular crystallography. *Acta Crystallogr D* 66: 12-21
- Collaborative Computational Project N (1994) The CCP4 suite: Programs for protein crystallography. *Acta Crystallogr D Biol Crystallogr* 50: 760-763
- Cowan K (2006) The Buccaneer software for automated model building. 1. Tracing protein chains. *Acta Crystallogr D* 62: 1002-1011

- Craxton A, Caffrey JJ, Burkhart W, Safrany ST, Shears SB (1997) Molecular cloning and expression of a rat hepatic multiple inositol polyphosphate phosphatase. *Biochem J* 328: 75-81
- Dassa E, Boquet PL (1985) Identification of the Gene Appa for the Acid-Phosphatase (Ph Optimum 2.5) of Escherichia-Coli. *Mol Gen Genet* 200: 68-73
- Ehrlich KC, Montalbano BG, Mullaney EJ, Dischinger HC, Jr., Ullah AH (1993) Identification and cloning of a second phytase gene (phyB) from Aspergillus niger (ficuum). *Biochemical and biophysical research communications* 195: 53-57
- Emsley P, Cowtan K (2004) Coot: model-building tools for molecular graphics. *Acta Crystallogr D* 60: 2126-2132
- Evans P (2006) Scaling and assessment of data quality. *Acta Crystallogr D Biol Crystallogr* 62: 72-82
- Holm L, Park J (2000) DaliLite workbench for protein structure comparison. *Bioinformatics* 16: 566-567
- Isbrandt LR, Oertel RP (1980) Conformational States of Myoinositol Hexakis(Phosphate) in Aqueous-Solution - a C-13 Nmr, P-31 Nmr, and Raman-Spectroscopic Investigation. *J Am Chem Soc* 102: 3144-3148
- Jakob CG, Lewinski K, Kuciel R, Ostrowski W, Lebiada L (2000) Crystal structure of human prostatic acid phosphatase. *The Prostate* 42: 211-218
- Kleywegt GJ, Henrick K, Dodson EJ, van Aalten DMF (2003) Pound-wise but penny-foolish-How well do macromolecules fare in macromolecular refinement? *Structure* 11: 1051-1059
- Kostrewa D, Leitch FG, D'Arcy A, Broger C, Mitchell D, vanLoon APGM (1997) Crystal structure of phytase from Aspergillus ficuum at 2.5 angstrom resolution. *Nat Struct Biol* 4: 185-190
- Kostrewa D, Wyss M, D'Arcy A, van Loon APGM (1999) Crystal structure of Aspergillus niger pH 2.5 acid phosphatase at 2.4 angstrom resolution. *J Mol Biol* 288: 965-974
- Lee DC, Cottrill MA, Forsberg CW, Jia Z (2003) Functional insights revealed by the crystal structures of Escherichia coli glucose-1-phosphatase. *J Biol Chem* 278: 31412-31418
- Leslie AG (1999) Integration of macromolecular diffraction data. *Acta Crystallogr D Biol Crystallogr* 55: 1696-1702
- Lim D, Golovan S, Forsberg CW, Jia Z (2000) Crystal structures of Escherichia coli phytase and its complex with phytate. *Nat Struct Biol* 7: 108-113
- Lindqvist Y, Schneider G, Vihko P (1993) Three-dimensional structure of rat acid phosphatase in complex with L(+)-tartrate. *J Biol Chem* 268: 20744-20746
- Liu Q, Huang Q, Lei XG, Hao Q (2004) Crystallographic snapshots of Aspergillus fumigatus phytase, revealing its enzymatic dynamics. *Structure* 12: 1575-1583
- Morris GM, Huey R, Lindstrom W, Sanner MF, Belew RK, Goodsell DS, Olson AJ (2009) AutoDock4 and AutoDockTools4: Automated Docking with Selective Receptor Flexibility. *J Comput Chem* 30: 2785-2791

- Nagy R, Grob H, Weder B, Green P, Klein M, Frelet-Barrand A, Schjoerring JK, Brearley C, Martinoia E (2009) The Arabidopsis ATP-binding Cassette Protein AtMRP5/AtABCC5 Is a High Affinity Inositol Hexakisphosphate Transporter Involved in Guard Cell Signaling and Phytate Storage. *J Biol Chem* 284: 33614-33622
- Noltmann E, Gubler CJ, Kuby SA (1961) Glucose 6-Phosphate Dehydrogenase (Zwischenferment) .1. Isolation of Crystalline Enzyme from Yeast. *J Biol Chem* 236: 1225-&
- Notredame C, Higgins DG, Heringa J (2000) T-Coffee: A novel method for fast and accurate multiple sequence alignment. *J Mol Biol* 302: 205-217
- Oakley AJ (2010) The structure of *Aspergillus niger* phytase PhyA in complex with a phytate mimetic. *Biochem Biophys Res Comm* 397: 745-749
- Osborn MJ, Gander JE, Parisi E, Carson J (1972) Mechanism of Assembly of Outer Membrane of Salmonella-Typhimurium - Isolation and Characterization of Cytoplasmic and Outer Membrane. *J Biol Chem* 247: 3962-&
- Ragon M, Hoh F, Aumelas A, Chiche L, Moulin G, Boze H (2009) Structure of *Debaryomyces castellii* CBS 2923 phytase. *Acta Crystallogr F* 65: 321-326
- Rigden DJ (2008) The histidine phosphatase superfamily: structure and function. *Biochem J* 409: 333-348
- Rodriguez E, Han YM, Lei XG (1999) Cloning, sequencing, and expression of an *Escherichia coli* acid phosphatase/phytase gene (appA2) isolated from pig colon. *Biochemical and biophysical research communications* 257: 117-123
- Romano PR, Wang J, O'Keefe RJ, Puzas JE, Rosier RN, Reynolds PR (1998) HiPER1, a phosphatase of the endoplasmic reticulum with a role in chondrocyte maturation. *J Cell Sci* 111: 803-813
- Sambrook J, Russel DW (2001) *Molecular cloning: A laboratory Manual*, New York, USA: Cold Spring Harbor Press.
- Sheldrick GM (2008) SHELXL97 and SHELXS97, programs for crystal structure solution and refinement. *Acta Crystallogr* 64: 112-122
- Shoemaker NB, Getty C, Gardner JF, Salyers AA (1986) Tn4351 Transposes in *Bacteroides* Spp and Mediates the Integration of Plasmid R751 into the *Bacteroides* Chromosome. *J Bacteriol* 165: 929-936
- Singh H, Felts RL, Schuermann JP, Reilly TJ, Tanner JJ (2009) Crystal Structures of the histidine acid phosphatase from *Francisella tularensis* provide insight into substrate recognition. *J Mol Biol* 394: 893-904
- Smith CJ, Rollins LA, Parker AC (1995) Nucleotide sequence determination and genetic analysis of the *Bacteroides* plasmid, pBI143. *Plasmid* 34: 211-222
- Tancula E, Feldhaus MJ, Bedzyk LA, Salyers AA (1992) Location and Characterization of Genes Involved in Binding of Starch to the Surface of *Bacteroides-Thetaiotaomicron*. *J Bacteriol* 174: 5609-5616
- Trott O, Olson AJ (2010) Software News and Update AutoDock Vina: Improving the Speed and Accuracy of Docking with a New Scoring Function, Efficient Optimization, and Multithreading. *J Comput Chem* 31: 455-461

Ullah AH, Dischinger HC, Jr. (1993) Aspergillus ficuum phytase: complete primary structure elucidation by chemical sequencing. *Biochemical and biophysical research communications* 192: 747-753

van Hartingsveldt W, van Zeijl CM, Harteveld GM, Gouka RJ, Suykerbuyk ME, Luiten RG, van Paridon PA, Selten GC, Veenstra AE, van Gorcom RF, et al. (1993) Cloning, characterization and overexpression of the phytase-encoding gene (phyA) of Aspergillus niger. *Gene* 127: 87-94

Wegmann U, Horn N, Carding SR (2013) Defining the Bacteroides Ribosomal Binding Site. *Appl Environ Microb* 79: 1980-1989



**Figure S1. The products of BtMinpp activity against InsP<sub>6</sub> are distinct from the products of attack of fungal phytase.** Phytase and Minpps were incubated with *myo*-inositol(1,[<sup>32</sup>P]2,3,4,5,6)P<sub>6</sub> and the products resolved on a Partisphere SAX HPLC column eluted with a gradient of (NH<sub>4</sub>)<sub>2</sub>HPO<sub>4</sub>. human MINPP1 (A), *Aspergillus ficuum* phytase (Sigma) (B), recombinant *B. thetaiotaomicron* BtMinpp (C). The traces also show the elution of internal standards of AMP, ADP and ATP monitored at a wavelength of 259nm (grey line), and radioactivity monitored on-line by Cerenkov counting (black line). The regions of the chromatogram in which InsP<sub>2</sub>, InsP<sub>3</sub> and InsP<sub>4</sub> isomers elute are indicated in (A). The Ins(1,[<sup>32</sup>P]2,3,4,5,6)P<sub>6</sub> preparation used in (A) contained residual [<sup>32</sup>P]ATP.

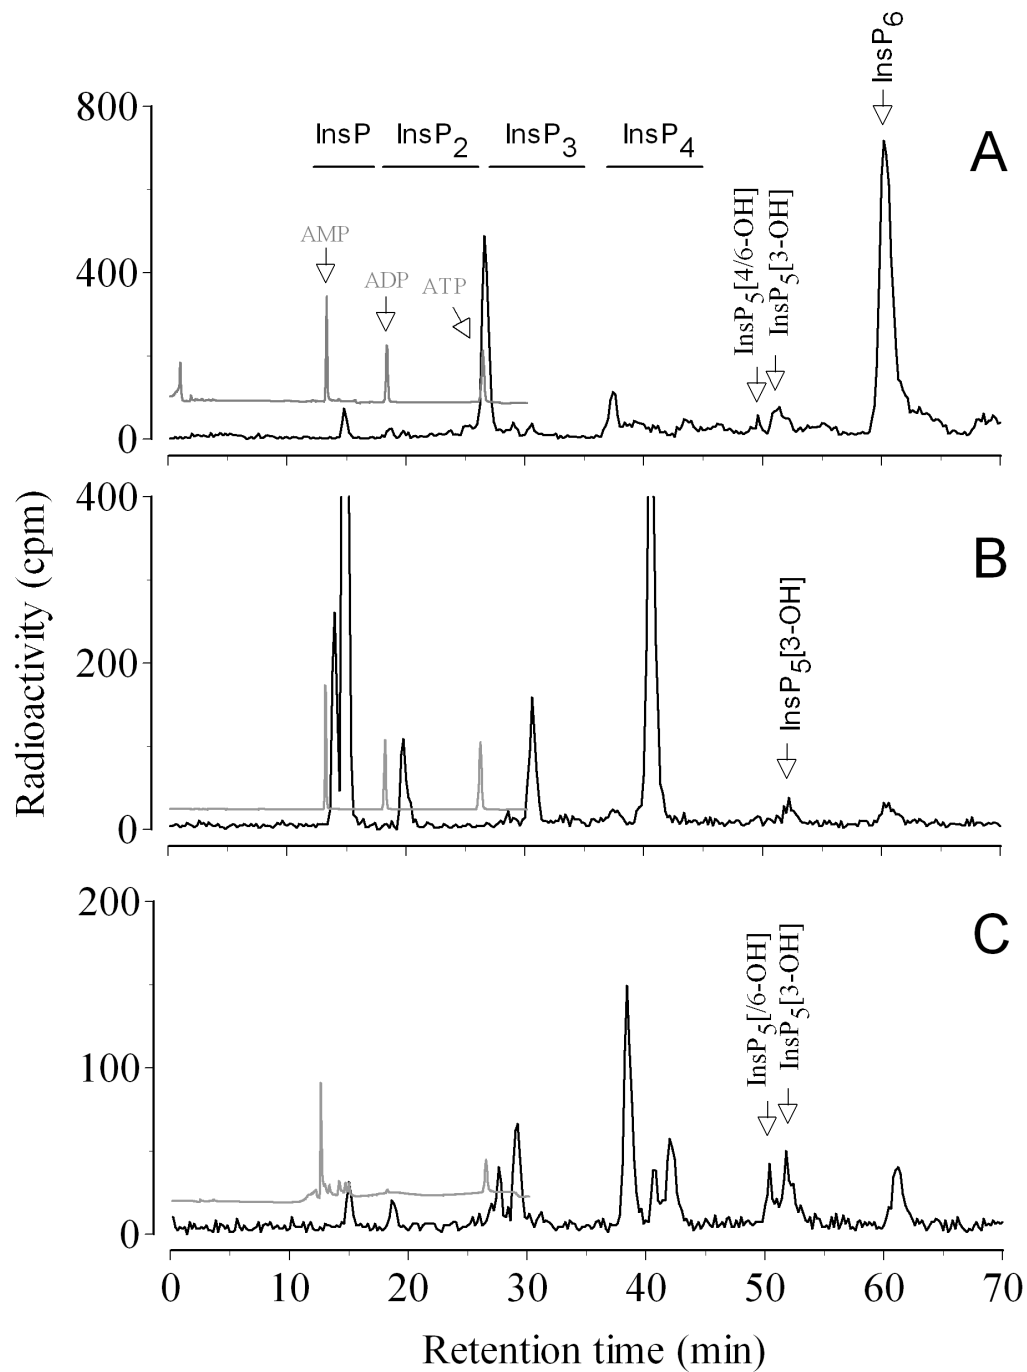

**Figure S2. Products of hydrolysis of Ins(1,3,4,5)P<sub>4</sub> and InsP<sub>6</sub>.** (A) Native BtMinpp was incubated with [<sup>3</sup>H]Ins(1,3,4,5)P<sub>4</sub> at pH 7.0. The products were mixed with [<sup>14</sup>C]Ins(1,3,4)P<sub>3</sub> and resolved by HPLC. Fractions were collected and radioactivity estimated by scintillation counting: <sup>3</sup>H, open circles; <sup>14</sup>C, filled circles. The position of elution of Ins(1,4,5)P<sub>3</sub>, revealed in parallel HPLC runs, is also shown. (B) Native BtMinpp was incubated with *myo*-inositol(1,[<sup>32</sup>P]2,3,4,5,6)P<sub>6</sub>. Products were resolved by Partisphere SAX HPLC and detected by on-line Cerenkov counting. The regions of the chromatogram in which InsP<sub>3</sub> and InsP<sub>4</sub> isomers elute are indicated. The peak eluting at approximately 15 min was present in the preparation of *myo*-inositol(1,[<sup>32</sup>P]2,3,4,5,6)P<sub>6</sub>.

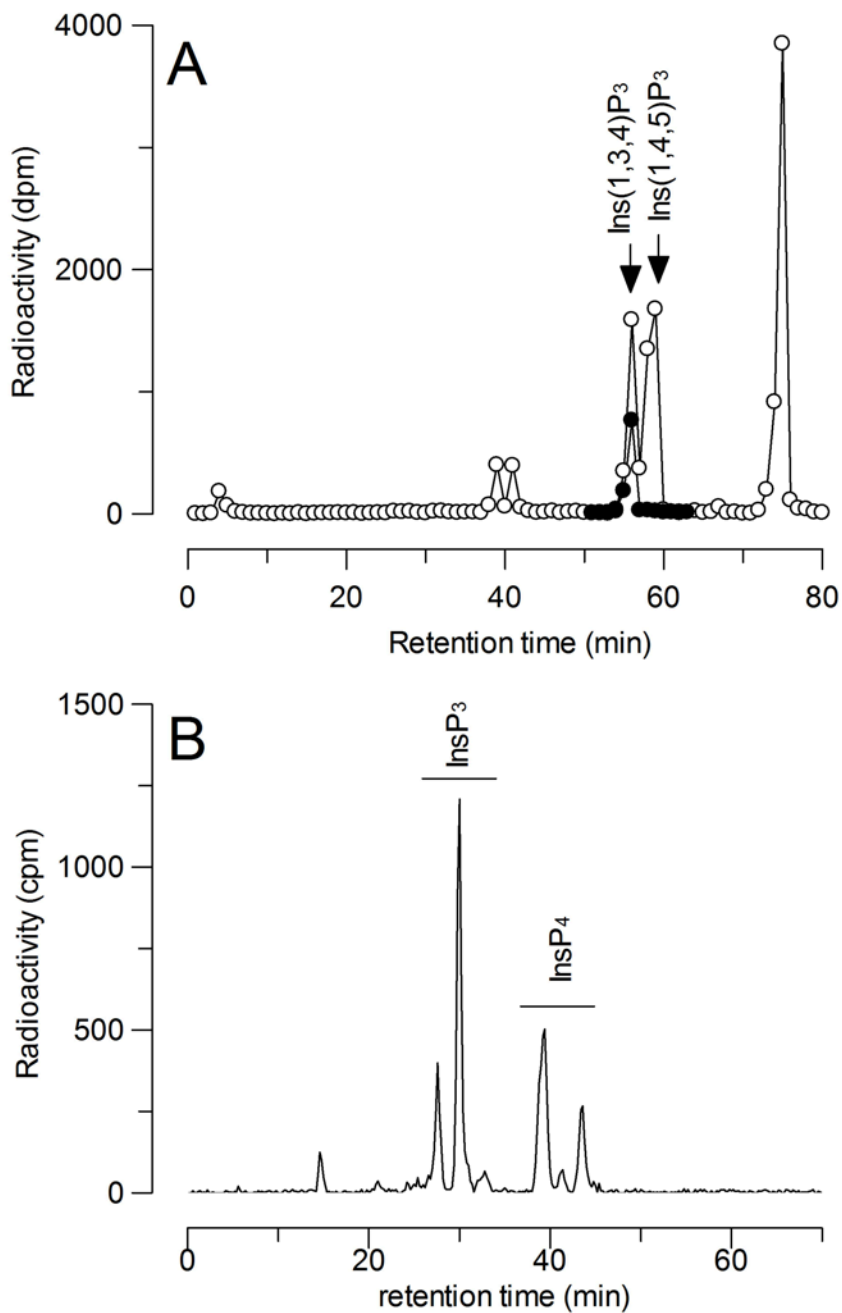

**Figure S3.** Relative InsP<sub>6</sub> phosphatase activity (%) of recombinant BtMinpp at different pH values

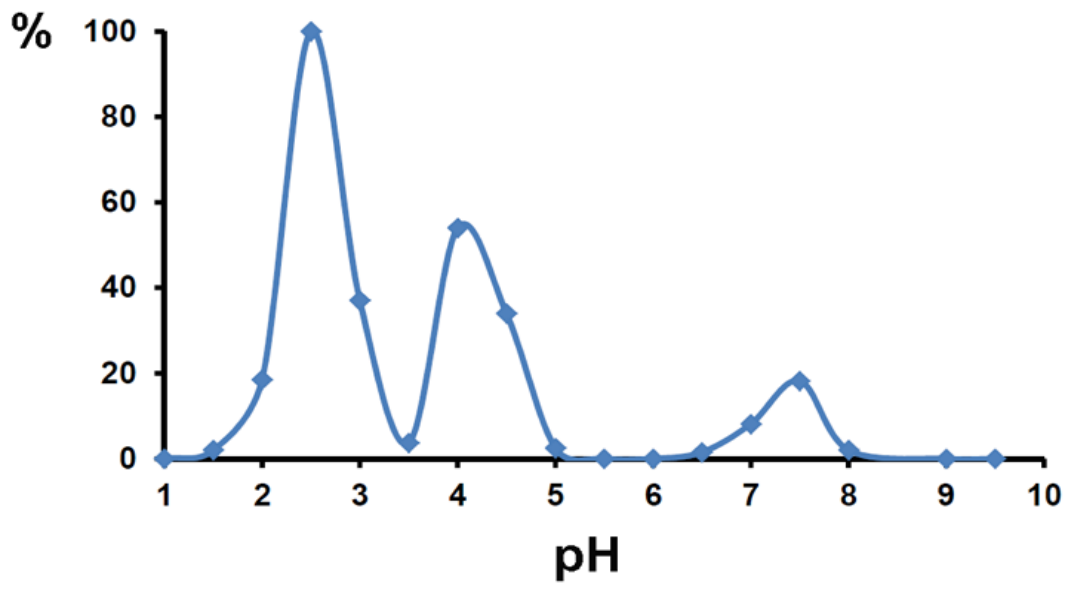

**Figure S4. Active site electron density for the complex of BtMinpp with inorganic phosphate.** A region of the Sigma-A weighted double difference Fourier electron density map contoured at  $1.1 \sigma$  for the residues of the fingerprint RHGXXRP (58-64) and HAE (323-325) residues of the active site of the complex of BtMinpp with inorganic phosphate. Active site residues and phosphate group are shown as sticks.

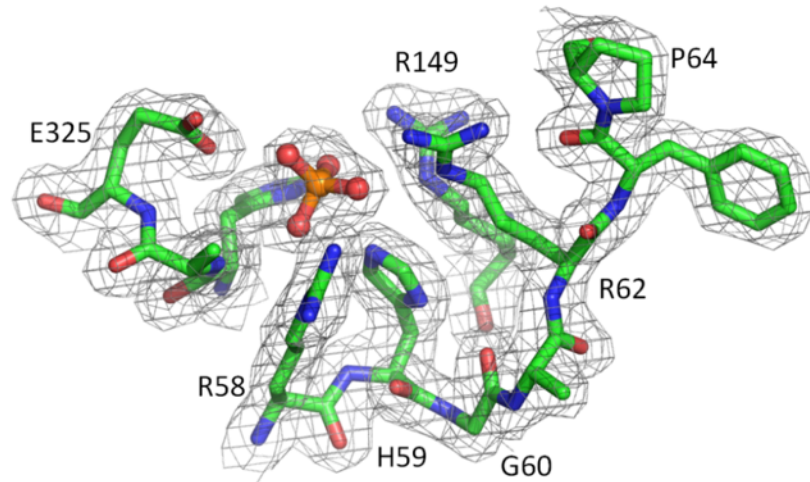

**Figure S5. A T-coffee (Notredame et al, 2000) alignment of the sequences of BtMinpp and selected MINPPs.** Sequences are: BtMinpp – this study, sequence database entry Q89YI8; Human – Human multiple inositol polyphosphate histidine phosphatase 1, Q9UNW1; Rat - Rat multiple inositol polyphosphate histidine phosphatase 1 O35217; Chicken - Histidine phosphatase of the endoplasmic reticulum from chicken, Q92170. Residue numbering follows that of BtMinpp. Absolutely conserved residues are shown in red boxes, conserved residues are boxed in blue. Secondary structural elements of BtMinpp are shown, labelled to reflect homology with the corresponding elements in the structure of *A. niger* PhyA (Oakley, 2010). Blue triangles indicate residues which make direct contact with the InsS<sub>6</sub> ligand in its complex with BtMinpp, whilst green triangles show those additional residues which have an atom within 8 Å of the ligand.

BtMinpp .....MKRLLFVLT FMSLTFPVVWGQTKIQK YAGTAMP YP.....NRDSS I.....  
 Human MLRAPGCLLRTSVAPAAALAAALLS SLARCSLELEPRDPVASSLSPYFGTKTRYEDVNPVLLSGPEA..PWRD  
 Rat MLRGARSHLSASVALAAVLAALLS SFA RCSLELEPRGDPVASVLSPYFGTKTRYEDVNPVLLGDPVA..PRRD  
 Chicken .....MAPCR AACLLP LLVAVASAGLGG.....YFGTKSR YEEVNPHLAEDPLSLGPHAA  
▲▲▲▲▲

BtMinpp ..TFRDGMTEFYINHLGRHGARFPTS R...KALDKVLEKVLVSAQQENGLT.....SEGMA LLSMI RRLSRLF  
 Human PELLEGTC TPVQLVALIRHGTRYPTVKQIRKRLQLHGILLQARGSRDGGASSTGSRDLGAAADWPLWYAD..  
 Rat PELLAGTC TPVQLVALIRHGTRYPTVKQIRKRLQLQGILLQARGSRDGGASSTGSRDLGAAADWPLWYAD..  
 Chicken AARLP AACAPLQLRRVVRHGTRYPTA GQIRRLAELHGRRLRAA AFSPCP.....AA..AALAAWPMWYEE..  
▲▲▲▲▲

BtMinpp DGQWGLSKLGETEQE G IAGRMIRNYPQLF SN..SAKIEAIAT YVPRRSINSMDAFLSCMIRHN.PALQV.QR  
 Human .WMDGGLVEKGRQDMRQLALRLASLFPALF SRENYGRRLRLITS SKHRCMDSSAFLQGLWQHYPGLPPPDV  
 Rat .WMDGGLVEKGRQDMRQLALRLAALFPALF SRENYGRRLRLITS SKHRCMDSSAFLQGLWQHYPGLPPPDV  
 Chicken .SLDGR LAFRRGRDMEHLARRLAARFPALF AA..RRRLALASSSKHRC LQSGAFLRRGLGPSLSLG...ADE  
▲▲▲▲▲

BtMinpp SE.....GKQYNHILRFFDLNKSYVNYKEKGDWLP IYKAFVHKKI SPVPI MKKFLLNPEQYI.DK EAEFV M  
 Human ADMFEGPPTVNDKLMRFFDHCEKFLTVEVEKNATALYHVEAFKTGPEMQNILKKVAATLQVPVNDL NADLIQV  
 Rat SDMECDPPRVNDKLMRFFDHCEKFLTVEVEKNATALYHVEAFKTGPEMQNILKKVAATLQVPVNNL NADLIQV  
 Chicken TEIE.....VNDA LMRFFDHCDKFVA FVE DNDTAMYQVNAFKEGPEMRK VLEKVASLCLPASEL NADLVQV  
▲▲▲▲▲

BtMinpp ALFSVAALIPDTSIPLNLEDLFTLDEWHRYWQFNLRQYMSKSSAPV GKM L PVAIWP L LSEFIRSAQ EVI S  
 Human AFFTCSFDLAIKGVKSPWCDVFDIDDAK VLEYLNDLKOYWKRGY...GYTINSRSC LTFQDIFQHLDKAVE  
 Rat AFFTCSFDLAIQGVHSPWCDVFDIDDAK VLEYLNDLKOYWKRGY...GYAINSRSC LTFQDIFQHLDKAVE  
 Chicken AFLTCSYBLAIKNTVSPWCSLFS EEDAKVLEYLNDLKOYWKRGY...GYDINSRSC LTFQDIFQHLDKAVD  
▲▲▲▲▲

BtMinpp GKSDYQ.....ANFRFAHAETVIPFVSLMGI BKT D VQVCRPDSVSVYWK...DYB ISEMAANVQWLFYR...  
 Human QKORSQPISSPVILQFGHAETLLPLLSLMGYKDK EPLTAYNYKKQMHKFRSGL IVPYASNLIFVLYHCEN  
 Rat QKORSQPVSSPVILQFGHAETLLPLLSLMGYKDK EPLTAYNFEEQVHREFRSGH IVPYASNLIFVLYHCEN  
 Chicken ESRSSKPISSPLIVQVGHAE TLOPLLALMGYFKDAEPLQANNYIROAHRKFRSGR IVPYANLVFVLYHCEQ  
▲▲▲▲▲

BtMinpp ..DRDQR IWKVLLNEEAAALPISTACFPYYSW EKT R.....IFFNQRIEMAKKTL SV.FNE  
 Human AKTPKEQFRVQMLLNEKVLPLAYSQETVSYFEDLKNHYKDILQSCQT SEEC ELARANSTS.DEL  
 Rat AQTPQEKFIQMLLNEKVLPLLAHSQKTVAIYEDLKNHYQDILQSCQT SKECNLPKVNITS.DEL  
 Chicken .KTSK EEQVQMLLNEKPLMLFHH SNETISTYADLKSYYKDILQNCHFEEVCELPKVNGTVAD E L  
▲▲▲▲▲

**Table S1** Alignment of BtMinpp protein sequence with known MINPPs and phytases\*

| Accession   | Description                                                      | Coverage (%) | E value | Identity              | Alignment scores |
|-------------|------------------------------------------------------------------|--------------|---------|-----------------------|------------------|
| NP_813655   | <i>B. thetaiotaomicron</i><br>BtMinpp                            | 100          | 0       | 425/42<br>5<br>(100%) |                  |
| ZP_03475410 | <i>Parabacteroides johnsonii</i><br>PRABACTJOHN_010<br>69        | 97           | 0       | 257/41<br>6<br>(62%)  |                  |
| NP_004888   | Human MINPP1<br>(Caffrey et al, 1999)                            | 82           | 2e-14   | 90/381<br>(23%)       |                  |
| NP_062136   | Rat MINPP1<br>(Craxton et al, 1997)                              | 82           | 6e-15   | 81/377<br>(21%)       |                  |
| NP_989975   | Chicken HiPER1<br>(Romano et al, 1998)                           | 65           | 5e-08   | 70/306<br>(23%)       |                  |
| CAA78904    | <i>Aspergillus niger</i> PhyA<br>(van Hartingsveldt et al, 1993) | 28           | 4e-05   | 32/83<br>(38%)        |                  |
| AAA02934    | <i>A. niger</i> PhyB<br>(Ehrlich et al, 1993)                    | 18           | 6e-04   | 21/84<br>(25%)        |                  |
| AAB26466    | <i>A. ficuum</i> phytase<br>(Ullah & Dischinger, 1993)           | 19           | 2e-05   | 32/83<br>(38%)        |                  |
| AAA72086    | <i>Escherichia coli</i> AppA<br>(Dassa & Boquet, 1985)           | 5            | 0.27    | 7/15<br>(47%)         |                  |
| AAR87658    | <i>E. Coli</i> AppA2<br>(Rodriguez et al, 1999)                  | 17           | 0.18    | 21/70<br>(30%)        |                  |

\*Similarities of BtMinpp to known proteins were determined using the BLASTP 2 sequences tool for local alignment. BtMinpp is shown on the top line of the Table so that its entire length can be displayed for comparative purposes. The colour key for the alignment scores (in bits) is: red,  $\geq 200$ ; green, 50-80; blue, 40-50; black, 18-40.

**Table S2.** Molecular and Enzymatic Properties of BtMinpp

|                                        |                                                                                                                                                                                                                                                                                                                                                                                                                  |
|----------------------------------------|------------------------------------------------------------------------------------------------------------------------------------------------------------------------------------------------------------------------------------------------------------------------------------------------------------------------------------------------------------------------------------------------------------------|
| Molecular mass                         | 49 kDa, monomer                                                                                                                                                                                                                                                                                                                                                                                                  |
| pH optimum                             | 2.5, 4.0 and 7.5 (see Figure S1)                                                                                                                                                                                                                                                                                                                                                                                 |
| pH stability                           | Stable for 24 hours at pH between 2 and 5 at 4°C                                                                                                                                                                                                                                                                                                                                                                 |
| Kinetic constants at pH 7.5 and 37°C   | <p><u>InsP<sub>6</sub></u> <math>K_M: 44.78 \pm \mu\text{M}</math></p> <p><math>V_{\text{max}}: 69.63 \mu\text{moles/min/mg}</math></p> <p><math>K_{\text{cat}}: 57.1 \text{ s}^{-1}</math></p> <p><u>InsP<sub>4</sub></u> <math>K_M: 19.4 \pm 8.9 \mu\text{M}</math></p> <p><math>V_{\text{max}}: 1423 \pm 24 \mu\text{moles/min/mg}</math></p> <p><math>K_{\text{cat}}: 1167 \text{ s}^{-1}</math></p>         |
| Kinetic constants at pH 2.5 and 37°C   | <p><u>InsP<sub>6</sub></u> <math>K_M: 18.4 \pm 4.1 \mu\text{M}</math></p> <p><math>V_{\text{max}}: 178 \pm 32 \mu\text{moles/min/mg}</math></p> <p><math>K_{\text{cat}}: 146 \text{ s}^{-1}</math></p> <p><u>InsP<sub>4</sub></u> <math>K_M: 27.1 \pm 7.2 \mu\text{M}</math></p> <p><math>V_{\text{max}}: 6385 \pm 732 \mu\text{moles/min/mg}</math></p> <p><math>K_{\text{cat}}: 5238 \text{ s}^{-1}</math></p> |
| Pepsin resistance                      | High; >95% of initial activity after 30min at 37°C with 3000U pepsin                                                                                                                                                                                                                                                                                                                                             |
| Enzyme activity at low pH              | <p>pH 2.0: 18% of initial activity</p> <p>pH 1.0: 1.6% of initial activity</p>                                                                                                                                                                                                                                                                                                                                   |
| Temperature optimum                    | 55°C                                                                                                                                                                                                                                                                                                                                                                                                             |
| Residual activity at high temperatures | <p>70°C, 10 min: 1.26% of initial activity</p> <p>80°C, 10 min: 0% of initial activity</p>                                                                                                                                                                                                                                                                                                                       |



**Table S3.** Statistics from the comparison of BtMinpp with the structures of branch 2 histidine phosphatases. The residue identity is calculated as the percentage of residues found to be structurally-equivalent and chemically identical in the alignment.

| Protein  | PDB entry | Uniprot entry | Z-score | Number of Equivalent residues | Residue identity (%) | RMSD (Å) |
|----------|-----------|---------------|---------|-------------------------------|----------------------|----------|
| AfPhyA   | 1SK8      | O00092        | 35.0    | 366                           | 15                   | 2.7      |
| AnPhyA   | 3K4Q      | P34752        | 34.5    | 360                           | 16                   | 2.5      |
| AnPhyB   | 1QFX      | P34755        | 32.6    | 362                           | 14                   | 3.2      |
| DcPhyt   | 2GFI      | A2TBB4        | 33.1    | 363                           | 18                   | 2.7      |
| EcAppA   | 1DKL      | P07102        | 23.9    | 308                           | 13                   | 4.1      |
| EcG1Pase | 1NT4      | P19926        | 24.4    | 306                           | 12                   | 3.8      |
| FtHAP    | 3IT1      | O57942        | 25.1    | 291                           | 14                   | 3.6      |
| HaPhyA   | 4ARO      | H9TUK5        | 23.6    | 306                           | 12                   | 4.2      |
| HsPAP    | 1CVI      | P15309        | 25.5    | 300                           | 13                   | 3.6      |
| RnPAP    | 1RPA      | P20646        | 25.1    | 300                           | 14                   | 3.6      |

**Table S4.** Predicted low energy binding modes resulting from *in silico* docking of InsP<sub>6</sub> to enzyme structures. Columns show the identities of the phosphate groups of InsP<sub>6</sub> bound at either the S3 or S2 specificity subsites of BtMinpp and PhyA (*A.niger* phytase, PDB entry 3K4Q). The binding modes are indicated as either obverse (O) or reverse (R).

| <b>Enzyme</b> | <b>S3 pocket</b> | <b>S2 pocket</b> | <b>Binding Mode</b> |
|---------------|------------------|------------------|---------------------|
| BtMinpp       | D-5              | D-6              | R                   |
|               | D-6              | D-1              | R                   |
|               | D-3              | D-2              | O                   |
|               | D-6              | D-5              | O                   |
| PhyA          | D-3              | D-2              | O                   |

**Table S5. Genes annotated as phytases in 341 microbial genomes isolated from the human gastrointestinal tract (from the Human Microbiome Project, [http://www.hmpdacc-resources.org/cgi-bin/imgm\\_hmp/main.cgi](http://www.hmpdacc-resources.org/cgi-bin/imgm_hmp/main.cgi))**

| Genome                          | Phylum         | Locus Tag          | Gene Product Name |
|---------------------------------|----------------|--------------------|-------------------|
| Acidaminococcus sp. D21         | Firmicutes     | ACDG_00696         | phytase           |
| Oxalobacter formigenes OXCC13   | Proteobacteria | OFBG_00876         | 4-phytase         |
| Paenibacillus sp. HGF7          | Firmicutes     | HMPREF9413_5666    | 3-phytase         |
| Providencia stuartii ATCC 25827 | Proteobacteria | PstuA_020100004501 | 4-phytase         |

**Table S6. Source organisms for MINPP proteins\***

| Common name                       | NCBI Reference Sequence | Scientific name                                                         |
|-----------------------------------|-------------------------|-------------------------------------------------------------------------|
| Acidovorax avenae                 | YP_004236708.1          | <i>Acidovorax avenae</i> subsp. <i>avenae</i> ATCC 19860                |
| Acinetobacter baumannii           | YP_001846348.1          | <i>Acinetobacter baumannii</i> ACICU                                    |
| Acinetobacter calcoaceticus       | ADY81607.1              | <i>Acinetobacter calcoaceticus</i> PHEA-2                               |
| Acinetobacter sp. DR1             | YP_003732360.1          | <i>Acinetobacter</i> sp. DR1                                            |
| Aeromonas veronii                 | YP_004393571.1          | <i>Aeromonas veronii</i> B565                                           |
| Bacteroides thetaiotaomicron      | NP_813655.1             | <i>Bacteroides thetaiotaomicron</i> VPI-5482                            |
| Bacteroides xylanisolvens         | CBK68912.1              | <i>Bacteroides xylanisolvens</i> XB1A                                   |
| Bacteroides xylanisolvens         | CBK66891.1              | <i>Bacteroides xylanisolvens</i> XB1A                                   |
| Bacteroides xylanisolvens         | CBK68541.1              | <i>Bacteroides xylanisolvens</i> XB1A                                   |
| Bifidobacterium dentium           | YP_003361382.1          | <i>Bifidobacterium dentium</i> Bd1                                      |
| Bifidobacterium longum            | YP_002321769.1          | <i>Bifidobacterium longum</i> subsp. <i>infantis</i> ATCC 15697         |
| Bifidobacterium pseudocatenulatum | ZP_03743199.1           | <i>Bifidobacterium pseudocatenulatum</i> DSM 20438                      |
| Bradyrhizobium sp. BTAi1          | YP_001236730.1          | <i>Bradyrhizobium</i> sp. <i>BTAi1</i>                                  |
| Burkholderia ambifaria            | ZP_02888054.1           | <i>Burkholderia ambifaria</i> IOP40-10                                  |
| Burkholderia cenocepacia          | ZP_04942680.1           | <i>Burkholderia cenocepacia</i> PC184                                   |
| Burkholderia pseudomallei         | ZP_01765847.1           | <i>Burkholderia pseudomallei</i> 305                                    |
| Burkholderia thailandensis        | ZP_02466008.1           | <i>Burkholderia thailandensis</i> MSMB43                                |
| Clavibacter michiganensis         | YP_001221200.1          | <i>Clavibacter michiganensis</i> subsp. <i>michiganensis</i> NCPPB 382  |
| Enhydrobacter aerosaccus          | ZP_05619011.1           | <i>Enhydrobacter aerosaccus</i> SK60                                    |
| Fusobacterium mortiferum          | ZP_04568756.1           | <i>Fusobacterium mortiferum</i> ATCC 9817                               |
| Marinomonas sp. MWYL1             | YP_001339041.1          | <i>Marinomonas</i> sp. MWYL1                                            |
| Parabacteroides johnsonii         | ZP_03475410.1           | <i>Parabacteroides johnsonii</i> DSM 18315                              |
| Photobacterium leiognathi         | ZP_08311993.1           | <i>Photobacterium leiognathi</i> subsp. <i>mandapamensis</i> svers.1.1. |
| Rhodococcus erythropolis          | YP_002763531.1          | <i>Rhodococcus erythropolis</i> PR4                                     |
| Spirochaeta smaragdinae           | YP_003803564.1          | <i>Spirochaeta smaragdinae</i> DSM 11293                                |
| Streptomyces hygroscopicus        | ZP_07292879.1           | <i>Streptomyces hygroscopicus</i> ATCC 53653                            |
| Variovorax paradoxus              | YP_004156191.1          | <i>Variovorax paradoxus</i> EPS                                         |
| Arabidopsis thaliana              | NP_563856.1             | <i>Arabidopsis thaliana</i>                                             |
| Barley                            | ABJ98329.1              | <i>Hordeum vulgare</i>                                                  |
| Lily                              | ABD96177.1              | <i>Lilium longiflorum</i>                                               |
| Maize                             | NP_001149246.1          | <i>Zea mays</i>                                                         |
| Physcomitrella patens             | XP_001765102.1          | <i>Physcomitrella patens</i> subsp. <i>patens</i>                       |
| Rice Indica                       | EAY92352.1              | <i>Oryza sativa</i> Indica Group                                        |
| Rice Japonica                     | NP_001051705.1          | <i>Oryza sativa</i> Japonica Group                                      |
| Selaginella moellendorffii        | XP_002985961.1          | <i>Selaginella moellendorffii</i>                                       |
| Sorghum                           | XP_002466207.1          | <i>Sorghum bicolor</i>                                                  |
| Wheat                             | ABJ98331.1              | <i>Triticum aestivum</i>                                                |
| Albugo laibachii                  | CCA15134.1              | <i>Albugo laibachii</i> Nc14                                            |
| Capsaspora owczarzaki             | EFW47484.1              | <i>Capsaspora owczarzaki</i> ATCC 30864                                 |
| Dictyostelium discoideum          | XP_638245.1             | <i>Dictyostelium discoideum</i> AX4                                     |
| Phytophthora infestans            | XP_002907675.1          | <i>Phytophthora infestans</i> T30-4                                     |
| Chimpanzee                        | XP_507896.2             | <i>Pan troglodytes</i>                                                  |

|                           |                |                                      |
|---------------------------|----------------|--------------------------------------|
| Common marmoset           | XP_003087945.1 | <i>Callithrix jacchus</i>            |
| Giant panda               | XP_002756410.1 | <i>Ailuropoda melanoleuca</i>        |
| Gray short-tailed opossum | XP_001374318.1 | <i>Monodelphis domestica</i>         |
| Horse                     | XP_001503270.1 | <i>Equus caballus</i>                |
| Human                     | AAD02437.1     | <i>Homo sapiens</i>                  |
| Macaque                   | XP_001101346.1 | <i>Macaca mulatta</i>                |
| Mouse                     | EDL41725.1     | <i>Mus musculus</i>                  |
| Oikopleura dioica         | CBY40869.1     | <i>Oikopleura dioica</i>             |
| Oxen                      | NP_001033664.2 | <i>Bos taurus</i>                    |
| Rat                       | NP_062136.1    | <i>Rattus norvegicus</i>             |
| Sumatran orangutan        | NP_001126173.1 | <i>Pongo abelii</i>                  |
| Vase tunicate             | XP_002121164.1 | <i>Ciona intestinalis</i>            |
| Western clawed frog       | XP_002935472.1 | <i>Xenopus (Silurana) tropicalis</i> |
| Wild boar                 | XP_001927707.1 | <i>Sus scrofa</i>                    |

\*Animals, blue; Plants, green; Protists, salmon-pink; Bacteria, yellow.

**Table S7.** *Escherichia coli* and *Bacteroides* strains used in this study

| Species                   | Strain                   | Relevant characteristics *                                                                             | Source or reference    |
|---------------------------|--------------------------|--------------------------------------------------------------------------------------------------------|------------------------|
| <i>E. coli</i>            | HB101(pRK2013)           | Kana <sup>r</sup> , Contains RK2 transfer genes                                                        | DMSZ Collection        |
|                           | GC10                     | Cloning strain                                                                                         | Sigma                  |
|                           | GC10(pGH051)             | Tet <sup>R</sup>                                                                                       | This work              |
|                           | BL21-CodonPlus (DE3) RIL | Cm <sup>R</sup>                                                                                        | Stratagene             |
|                           | Rosetta™ 2(DE3)pLysS     | Cm <sup>R</sup>                                                                                        | Novagen                |
|                           | B834 (DE3)               |                                                                                                        | Novagen                |
|                           | B834-CodonPlus (DE3) RIL | Cm <sup>R</sup> , B834 (DE3) transformed with RIL plasmid                                              | This work              |
|                           | GH24                     | Amp <sup>R</sup> Cm <sup>R</sup> , <i>E. coli</i> BL21 (DE3) codon+ with pGH07                         | This work              |
|                           | GH25                     | Amp <sup>R</sup> Cm <sup>R</sup> , <i>E. coli</i> B834 (DE3) codon+ with pGH07                         | This work              |
| <i>B. fragilis</i>        | NCTC 9343                |                                                                                                        | DMSZ Collection        |
| <i>B. xylanisolvens</i>   | XB1A                     |                                                                                                        | (Chassard et al, 2008) |
| <i>B. thetaiotomicron</i> | VPI-5482                 |                                                                                                        | DMSZ Collection        |
| <i>B. thetaiotomicron</i> | GH59                     | VPI-5482 with tetracycline marked minpp, Tet <sup>f</sup>                                              | This work              |
| <i>B. thetaiotomicron</i> | GH120                    | GH59 containing pGH038 plasmid, Tet <sup>f</sup> , Cc <sup>f</sup> , expressing low levels of BtMinpp  | This work              |
| <i>B. thetaiotomicron</i> | GH115                    | GH59 containing pGH037 plasmid, Tet <sup>f</sup> , Cc <sup>f</sup> , expressing high levels of BtMinpp | This work              |

\* Kana, kanamycin; Tet, tetracycline; Cm, chloramphenicol, Amp, ampicillin; Cc, clindamycin
